# Supplementary material for: Charge-transfer transition regulation of thermally activated delayed fluorescence emitters by changing the valence of sulfur atoms
Source: Royal Society of Chemistry journal article supplement (doi:10.1039/d0tc03957h), 2020-01-01
Supplement: d0tc03957h1.pdf [file d0tc03957h1.pdf]

## **Electronic Supplementary Information**

### **Charge-transfer transition regulation of thermally activated delayed fluorescence emitters by changing the valence of sulfur atoms**

Xiang Zhang, Jia-Xiong Chen, Kai Wang,\* Yi-Zhong Shi, Xiao-Chun Fan, Shao-Li Zhang, Lin Wu, Yan-Qing Li, Xue-Mei Ou and Xiao-Hong Zhang\*

Institute of Functional Nano & Soft Materials (FUNSOM) and Jiangsu Key Laboratory for Carbon-Based Functional Materials & Devices, Soochow University, Suzhou, Jiangsu 215123, P.R. China

#### **Corresponding Author**

wkai@suda.edu.cn; xiaohong\_zhang@suda.edu.cn

**General information.** All reagents are purchased from commercial sources and used without further purification. And the final products Trz-S-DMAc and Trz-SO<sub>2</sub>-DMAc are first purified by column chromatography on silica (silica gel, 200-300 mesh) and further improving the purity by vacuum sublimating before using to study their photoluminescence and electroluminescence properties. <sup>1</sup>H and <sup>13</sup>C nuclear magnetic resonance (NMR) spectra are recorded on Bruker 400 and 600 spectrometers. Mass spectra are recorded on a Trace-ISQ mass spectrometer. Single-crystal X-ray structure analysis was obtained using a Bruker D8 Venture X-ray single crystal diffractometer. Cyclic voltammetry is performed on a CHI660E instrument. TGA and DSC measurements are tested in TAQ 500 thermogravimeter and DSC1 differential scanning calorimeter, respectively. Steady-state and time-resolved emission spectra are recorded by using an Edinburgh FLS980 spectrophotometer. Photoluminescence quantum yield (PLQY) are evaluated under oxygen-free condition with an integrating sphere. Calculations are performed using the Gaussian 09 package, and the ground state geometries in vacuum are simulated at the level of B3LYP/6-31G(d,p).

**Fabrication and Characterization of OLEDs:** Indium Tin Oxide (ITO) substrate was cleaned with detergents and deionized water, dried in an oven at 100 °C for 1 h, then treated with ultraviolet-ozone system treatment for 10 min, and finally transferred to a deposition chamber. At a base pressure of about  $2 \times 10^{-4}$  Pa, evaporated each layer onto ITO substrate sequentially to fabricate devices. The deposition rates of all organic layers were 1 - 2 Å s<sup>-1</sup>. LiF was deposited at the rate of 0.1 Å s<sup>-1</sup>, and Al was deposited at the rate of 6-7 Å s<sup>-1</sup>. The Electroluminescence (EL) spectra were measured with a PR655 spectra colorimeter and a Keithley 2400 source meter. EQEs were calculated based on current density, brightness and EL Spectra.

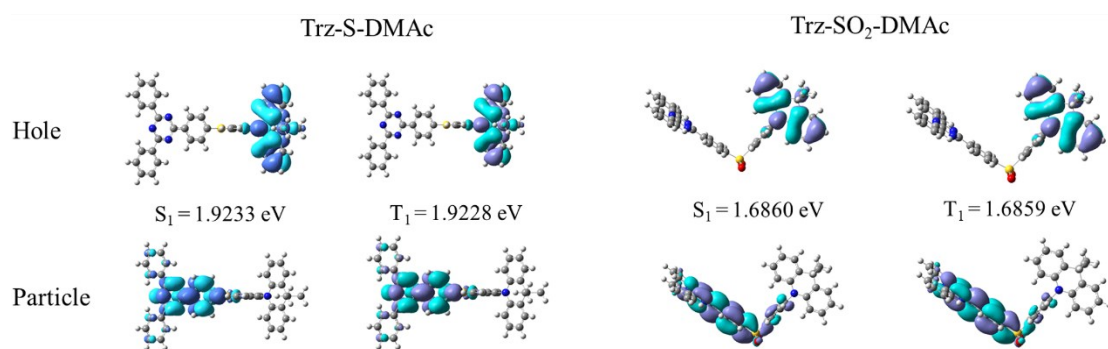

**Fig. S1** Natural transition orbitals (NTOs) of  $S_1$  and  $T_1$  states for (a) Trz-S-DMAc and (b) Trz-SO<sub>2</sub>-DMAc, and their corresponding energy levels.

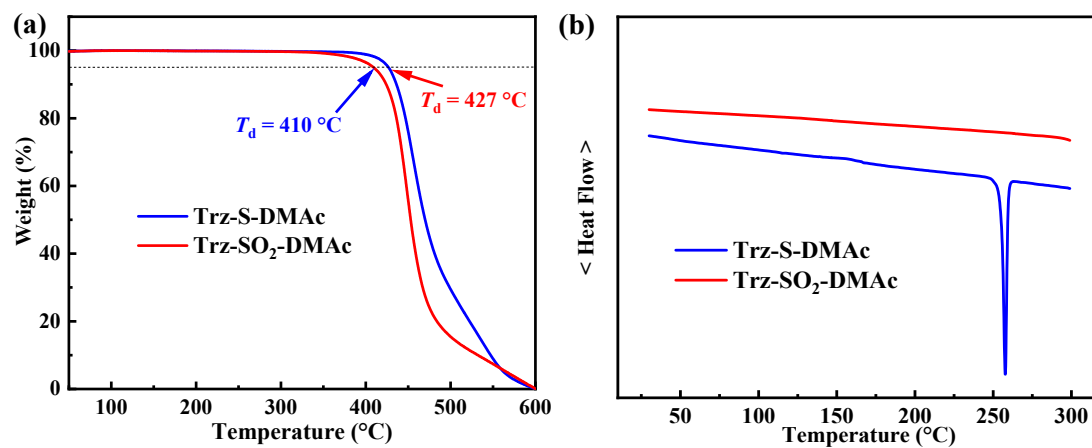

**Fig. S2** (a) TGA and (b) DSC curves of Trz-SO<sub>2</sub>-DMAc and Trz-S-DMAc.

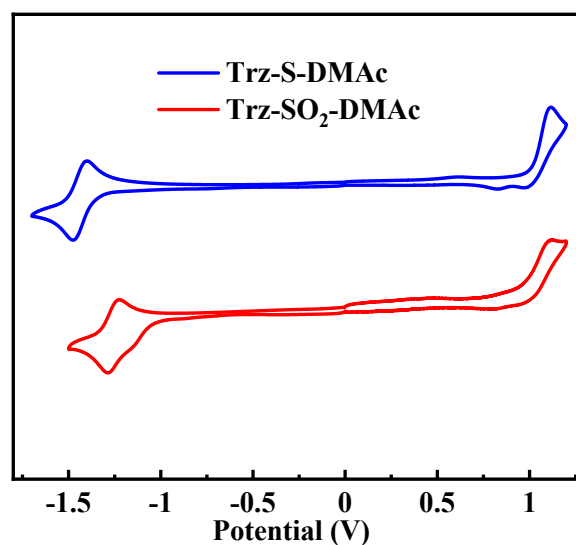

**Fig. S3** Cyclic voltammetry (CV) of Trz-S-DMAc and Trz-SO<sub>2</sub>-DMAc in DMF.

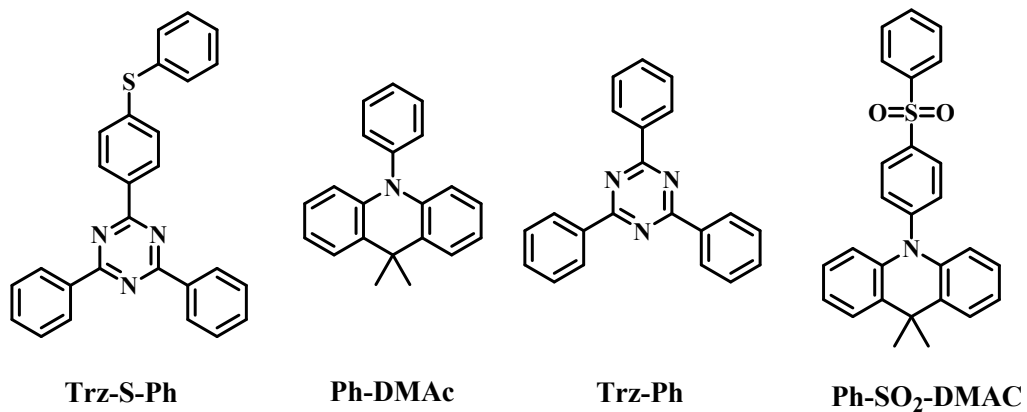

**Fig. S4** Detailed structures of the eigen derivatives.

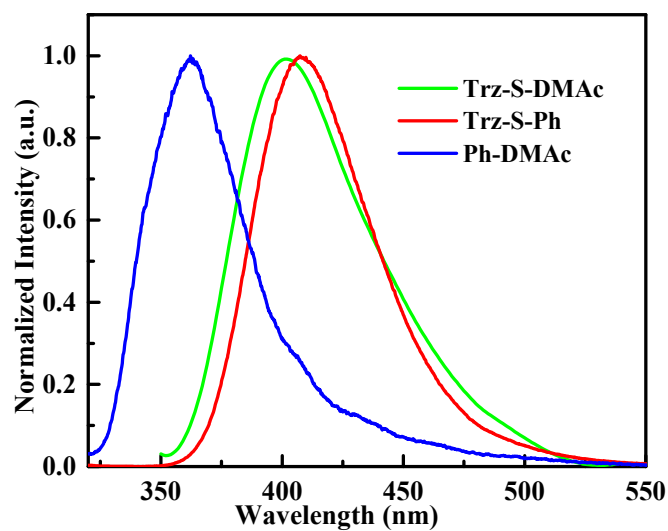

**Fig. S5** A PL spectral comparison of the films of Trz-S-DMAc (10<sup>-5</sup> M), Trz-S-Ph (10<sup>-3</sup> M), Ph-DMAc (10<sup>-3</sup> M) diluted in PMMA.

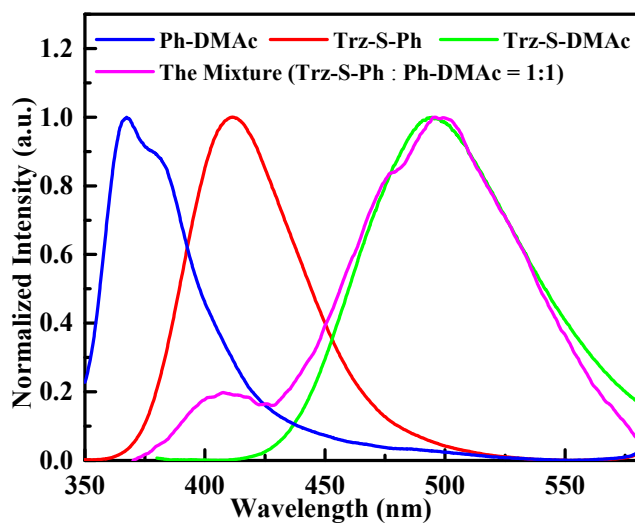

**Fig. S6** A PL spectral comparison of the neat films of Trz-S-Ph, Trz-S-DMAc, Ph-DMAc, and the 1:1 mixture of Trz-S-DMAc and Ph-DMAc, in which the components form an exciplex with evidently redshifted emission similar to that of Trz-S-DMAc.

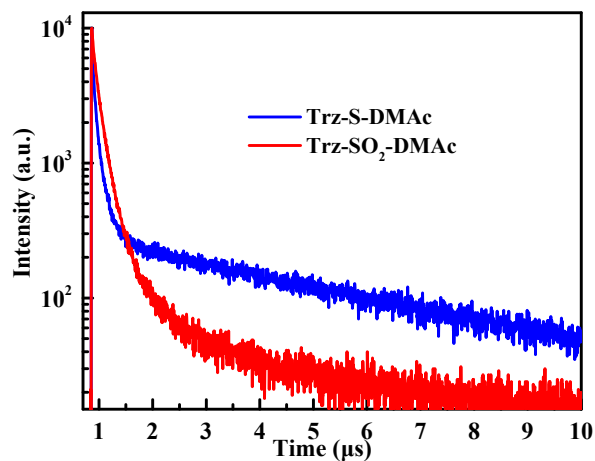

**Fig. S7** Transient PL decay curves of Trz-SO<sub>2</sub>-DMAc and Trz-S-DMAc neat films.

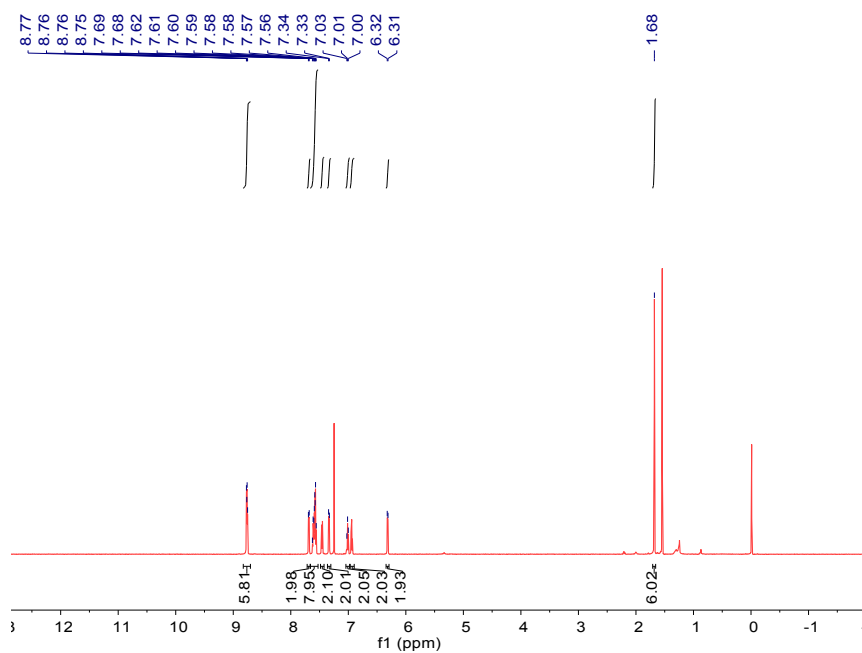

**Fig. S8** Copy of <sup>1</sup>H NMR spectrum of Trz-S-DMAc.

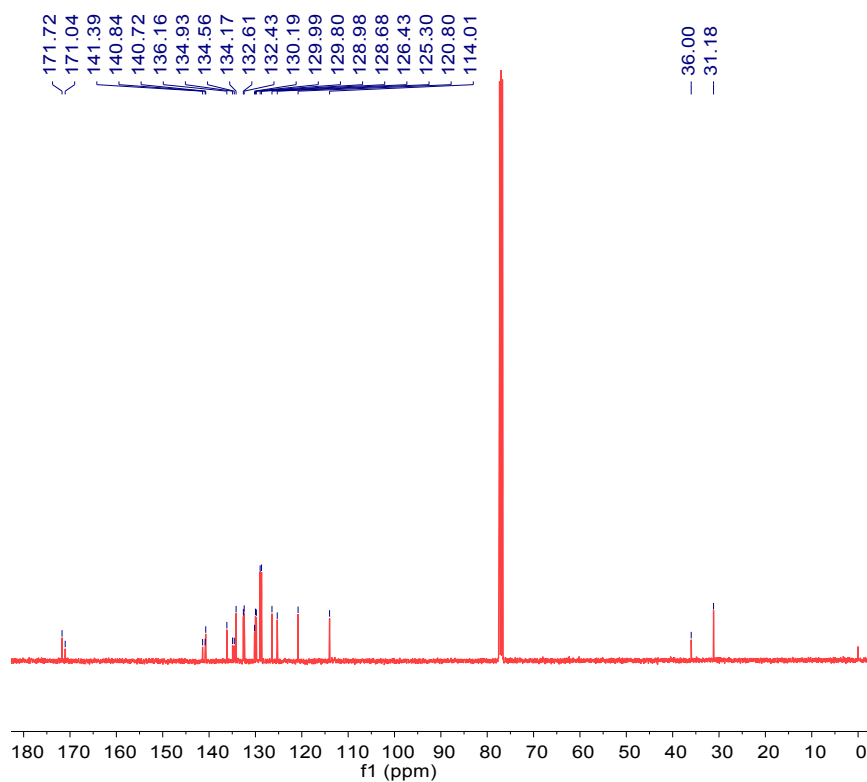

**Fig. S9** Copy of  $^{13}\text{C}$  NMR spectrum of Trz-S-DMAc.

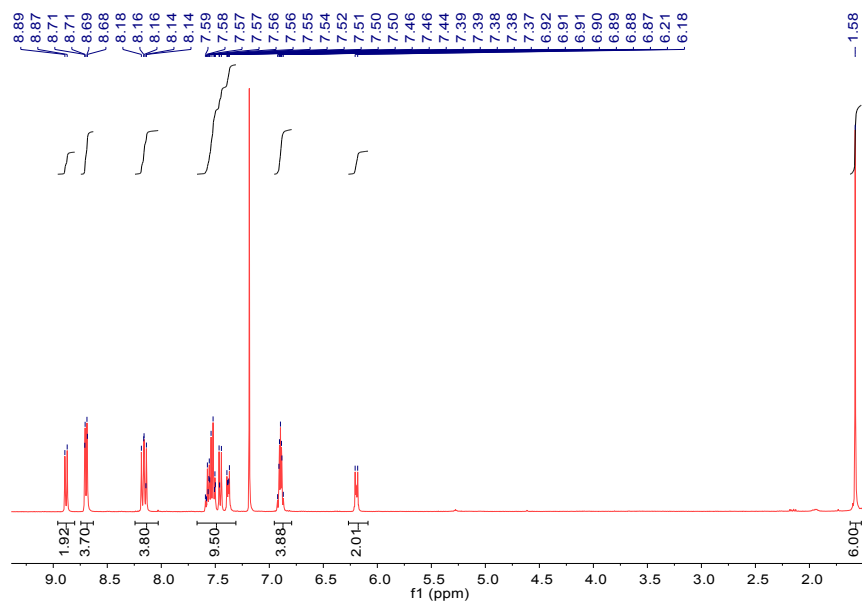

**Fig. S10** Copy of  $^1\text{H}$  NMR spectrum of Trz-SO<sub>2</sub>-DMAc.

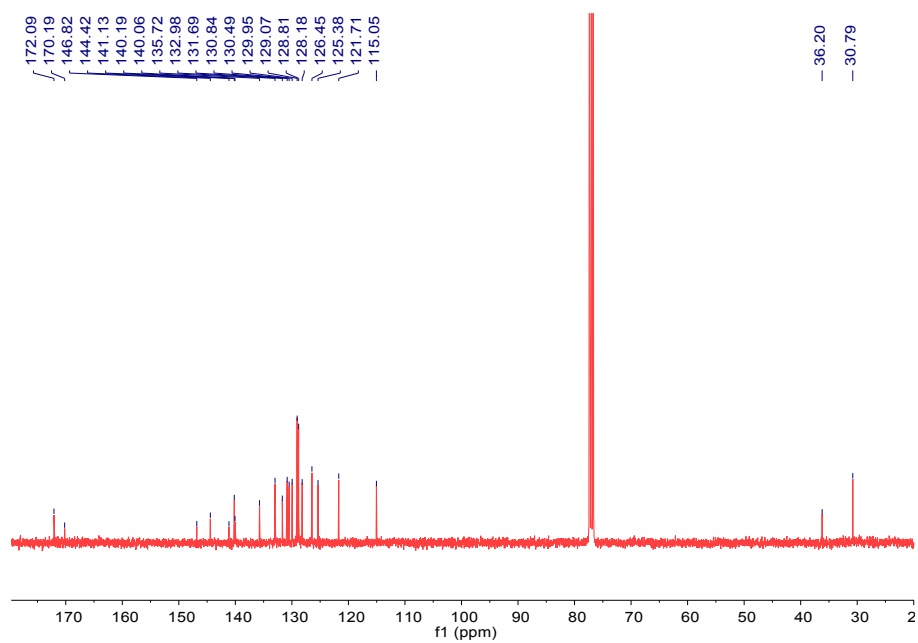

**Fig. S11** Copy of <sup>13</sup>C NMR spectrum of Trz-SO<sub>2</sub>-DMAc.
